# Supplementary material for: p73α1, an Isoform of the p73 Tumor Suppressor, Modulates Lipid Metabolism and Cancer Cell Growth via Stearoyl-CoA Desaturase-1
Source: MDPI journal article supplement (doi:10.3390/cells11162516), 2022-08-13
Supplement: s1 [file s1]

**A**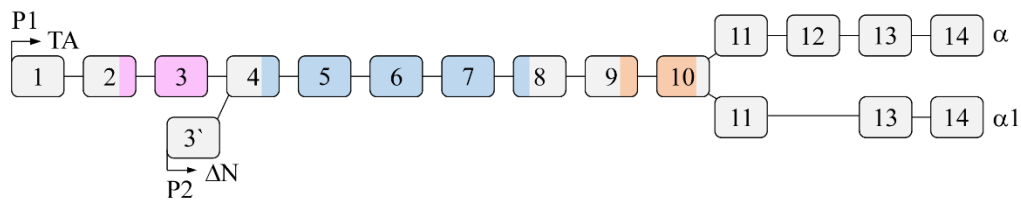**B**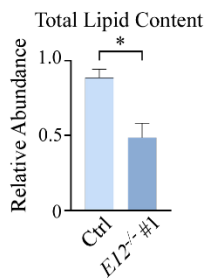**C**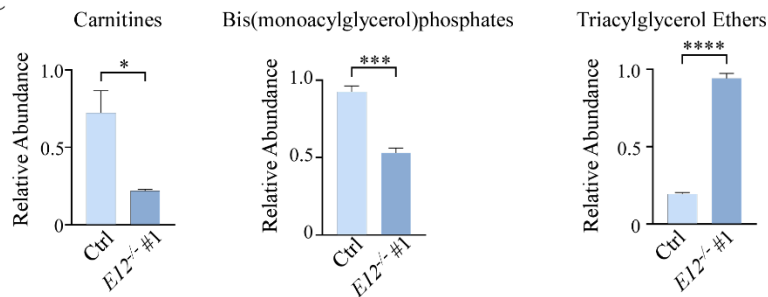**D**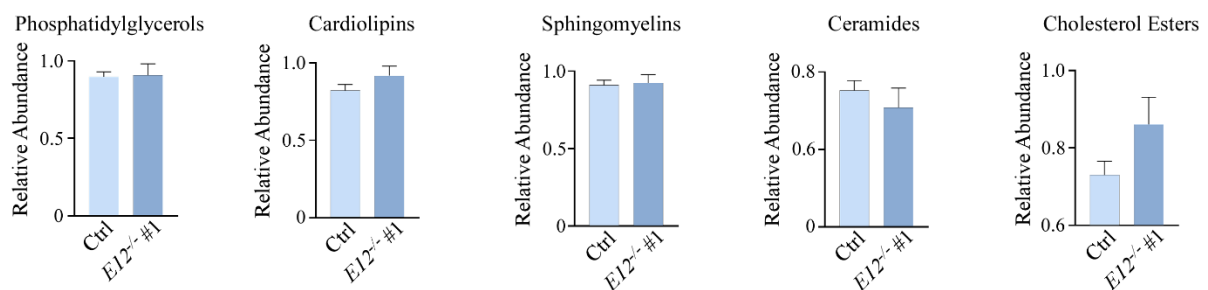

**Figure S1. Loss of *E12* alters the lipidome in H1299 cells.**

A. *TP73* diagram showing that loss of exon 12 leads to isoform switch from p73 $\alpha$  to p73 $\alpha$ 1. Pink region indicates transactivation domain, blue region indicates DNA binding domain, and orange region indicates oligomerization domain. P1: promoter 1; P2: promoter 2.

B. Relative abundance of total lipid content in isogenic control and *E12*<sup>-/-</sup> H1299 cells. Statistical significance was determined using Student's t-test.

C. Relative abundance of carnitines, bis(monoacylglycerol)phosphates, and triacylglycerol ethers in isogenic control and *E12*<sup>-/-</sup> H1299 cells. Statistical significance was determined using Student's t-test.

D. Relative abundance of phosphatidylglycerols, cardiolipins, sphingomyelins, ceramides, and cholesterol esters in isogenic control and *E12*<sup>-/-</sup> H1299 cells. Statistical significance was determined using Student's t-test.

For B-D. Data are presented as mean  $\pm$  SEM. n = 3 independent experiments. \* p < 0.05, \*\*\* p < 0.001, \*\*\*\* p < 0.0001.

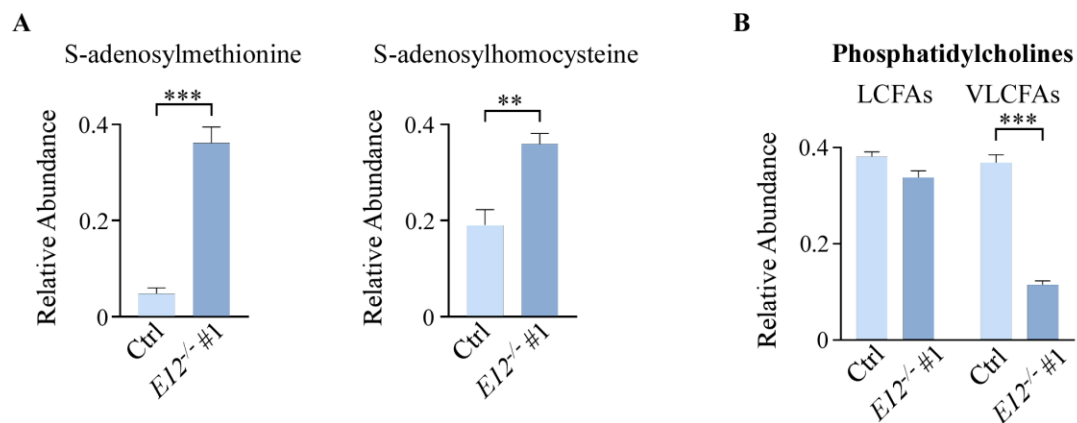

**Figure S2. Metabolites involved in PC synthesis are altered upon loss of *E12*.**

A. Relative abundance of S-adenosylmethionine and S-adenosylhomocysteine in isogenic control and *E12*<sup>-/-</sup> H1299 cell lines. Statistical significance was determined using Student's t-test.

B. Relative abundance of PCs containing (left) long-chain fatty acids (LCFAs) and (right) very long-chain fatty acids (VLCFAs) in isogenic control and *E12*<sup>-/-</sup> H1299 cell lines. Statistical significance was determined using Student's t-test.

For A-B. Data presented as mean  $\pm$  SEM. n = 3 independent experiments. \*\* p < 0.01, \*\*\* p < 0.001.

**A**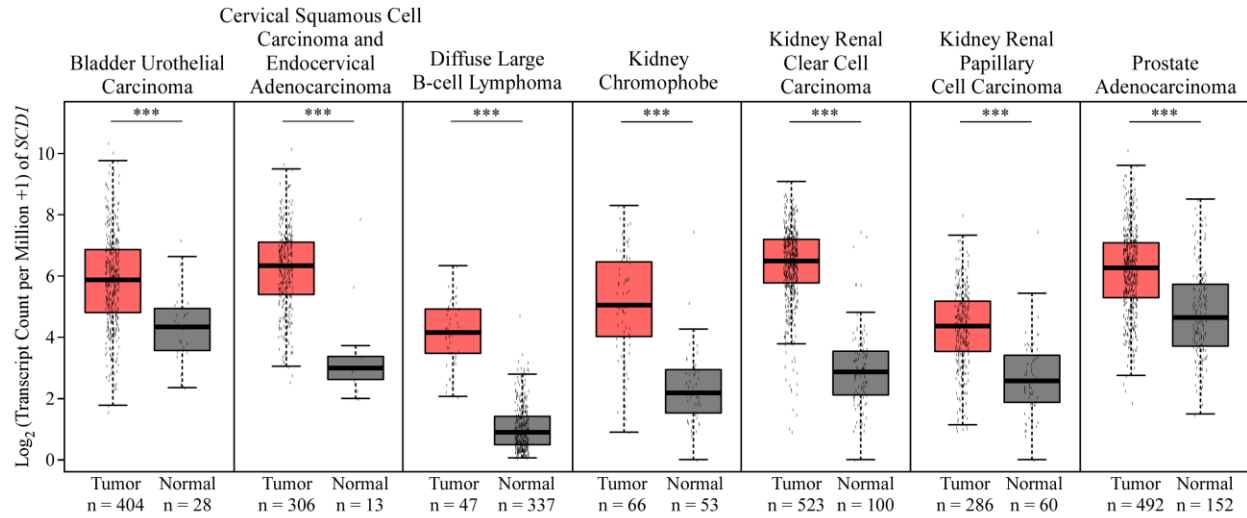**B**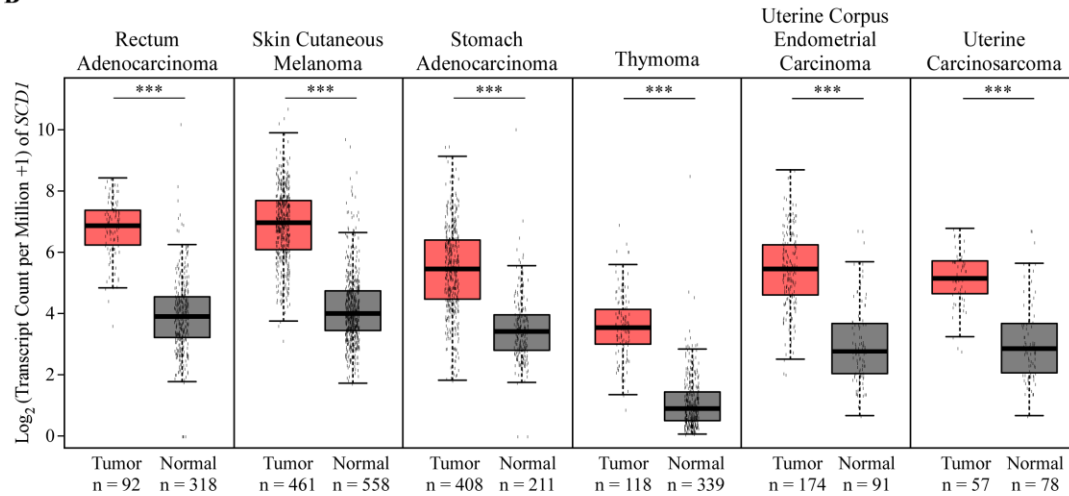

**Figure S3. *SCD1* transcript counts are increased in certain cancer types.**

A-B. *SCD1* transcript counts in the indicated tumors (data from TCGA) and the matched normal tissues (data from TCGA and GTEx) were analyzed via Gene Expression Profiling Interactive Analysis (GEPIA, <http://gepia.cancer-pku.cn/index.html>). \*\*\* p < 0.001.

**Table S1.** Primers used to generate expression vectors.

| Name                                   | Oligonucleotide | Sequence                       |
|----------------------------------------|-----------------|--------------------------------|
| p73-E12-gRNA-1-<br>pSpCas9(BB)-2A-Puro | Sense           | 5`-CACCGCGTCACATCGCCAGGCCTT-3` |
|                                        | Antisense       | 5`-AAACAAGGCCTGGCGATGTGACGC-3` |
| p73-E12-gRNA-2-<br>pSpCas9(BB)-2A-Puro | Sense           | 5`-CACCGCTGCTGCTCATCTCGCCGT-3` |
|                                        | Antisense       | 5`-AAACACGGCGAGATGAGCAGCAGC-3` |

**Table S2.** Primers used for qPCR and ChIP.

|                                 |           |                                 |
|---------------------------------|-----------|---------------------------------|
| <i>TP73<math>\alpha</math>1</i> | Sense     | 5`-CACCGTCAAACGTGGTGCCCCCATC-3` |
|                                 | Antisense | 5`-AAACGATGGGGGCACCACGTTTGAC-3` |
| <i>SCD1</i>                     | Sense     | 5`-CACTTGGGAGCCCTGTATGG-3`      |
|                                 | Antisense | 5`-TGAGCTCCTGCTGTTATGCC-3`      |
| <i>PCYT1A</i>                   | Sense     | 5`-GAGTTGCAGCATGTGCCGA-3`       |
|                                 | Antisense | 5`-GCATTGACCTTGGCTGAACA-3`      |
| <i>CEPT1</i>                    | Sense     | 5`-GGCAGTGATTGGAGGACCAC-3`      |
|                                 | Antisense | 5`-TGCCAACACCACCTGTGAAG-3`      |
| <i>SMPD4</i>                    | Sense     | 5`-GACTCCCAGCCCCGGTGT-3`        |
|                                 | Antisense | 5`-CCACTCGGAACACCATGAG-3`       |
| <i>SLC44A1</i>                  | Sense     | 5`-GCAGAGCTCCAAACGAGAA-3`       |
|                                 | Antisense | 5`-AGCCACAAATAAATCCCATCCC-3`    |
| <i>HPRT1</i>                    | Sense     | 5`-CACCGCGTCACATCGCCAGGCCTT-3`  |
|                                 | Antisense | 5`-AAACAAGGCCTGGCGATGTGACGC-3`  |
| <i>SCD1</i> -ChIP               | Sense     | 5`-TGCAGGGGTTTTTCGGAGTTT-3`     |
|                                 | Antisense | 5`-TGAACGCCCTATTCCAGCCTTA-3`    |
| <i>CDKN1A</i> -ChIP             | Sense     | 5`-GGTCTGCTACTGTGTCCTCC-3`      |
|                                 | Antisense | 5`-CATCTGAACAGAAATCCCAC-3`      |
| <i>GAPDH</i> -ChIP              | Sense     | 5`-AAAAGCGGGGAGAAAGTAGG-3`      |
|                                 | Antisense | 5`-AAGAAGATGCGGCTGACTGT-3`      |
